# Supplementary material for: The Clinical and Economic Impact of Employees Who Are Care Partners of Patients with Multiple Sclerosis by Disease Severity
Source: PubMed Central journal article supplement (PMC10105615; doi:10.36469/001c.57593), 2023-04-13
Supplement: jheor_2023_10_1_57593_156375.pdf [file jheor_2023_10_1_57593_156375.pdf]

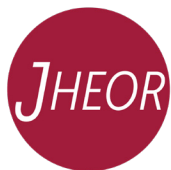

### **Online Supplementary Material**

The Clinical and Economic Impact of Employees Who Are Care Partners of Patients with Multiple Sclerosis by Disease Severity. *JHEOR*. 2023;10(1):91-101. [doi:10.36469/jheor.2023.57593](https://doi.org/10.36469/jheor.2023.57593)

#### **Appendix: Assessment of Disease Severity**

This supplementary material has been provided by the authors to give readers additional information about their work.

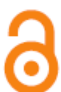

## APPENDIX: ASSESSMENT OF DISEASE SEVERITY

### Assessment of MS Severity

The claims for the patients with multiple sclerosis (MS) were examined to determine the disease severity. Based on clinical input from Dr. Hendin, four (4) body systems were examined.

Patients with MS were categorized as potentially:

- **Severe:** if they had  $\geq 1$  system category code from the table below
- **Moderate:** if they had no severe codes and any of the moderate codes from the table below
- **Mild:** if they had no severe or moderate codes

### Multiple Sclerosis Severity Level Criteria

| Body System       | Potential Classification                                                                                                                                                                        |                                                                                                                                                                                                          |                                                                      |
|-------------------|-------------------------------------------------------------------------------------------------------------------------------------------------------------------------------------------------|----------------------------------------------------------------------------------------------------------------------------------------------------------------------------------------------------------|----------------------------------------------------------------------|
|                   | Severe: a patient with MS and indicators for $\geq 1$ system category below <sup>a</sup>                                                                                                        | Moderate: a patient with MS, no Severe codes, and any of the following Moderate codes <sup>a</sup>                                                                                                       | Mild: a patient with MS and no Severe or Moderate codes <sup>a</sup> |
| Bladder/bowel     | Overactive bladder and/or visit to a urologist<br>Urinary incontinence AND Rx for urinary incontinence AND visit to a urologist<br>Stool incontinence                                           | Urinary incontinence diagnosis AND Rx for urinary incontinence                                                                                                                                           | Urinary incontinence                                                 |
| Psychiatric       | (Depression OR Rx for antidepressants) OR (anxiety OR Rx for antianxiety medications) AND visit to a psychiatrist                                                                               | (Depression OR Rx for antidepressants) OR (anxiety OR Rx for antianxiety medications)                                                                                                                    |                                                                      |
| Cognitive         | Dementia (non-Alzheimer's)                                                                                                                                                                      | Mild cognitive impairment                                                                                                                                                                                |                                                                      |
| Physical function | Spasticity diagnosis AND Baclofen IV<br>Evidence of a wheelchair<br>Evidence of a fall<br>(Dysesthesia/paresthesia/hyperesthesia) AND pain medications/opioids and a visit to a pain specialist | Spasticity diagnosis AND (Botox administration codes)<br>(Dysesthesia/paresthesia/ hyperesthesia) AND pain-modulating medications or opioids<br>Evidence of cane/walker<br>Rx for dalfampridine (Ampyra) |                                                                      |

<sup>a</sup>Prescription codes, ICD-9/-10, and CPT codes were finalized in a workbook with the study team.

**Note:** Pain, including fibromyalgia, trigeminal neuralgia, other pain syndromes, numbness/tingling, fatigue, soft-tissue disorders, and optic neuritis were not included since these symptoms could be present across the 3 categories.
